# Supplementary material for: The novel p53 target gene IRF2BP2 participates in cell survival during the p53 stress response
Source: PubMed Central journal article supplement — Nucleic Acids Res. 2008 Nov 28;37(2):322–35. doi: 10.1093/nar/gkn940 (PMC2632907; doi:10.1093/nar/gkn940), 2008-11-28
Supplement: gkn940_1.pdf [file gkn940_1.pdf]

Supplemental Data

THE NOVEL P53 TARGET GENE IRF2BP2 PARTICIPATES IN CELL SURVIVAL DURING THE P53 STRESS RESPONSE

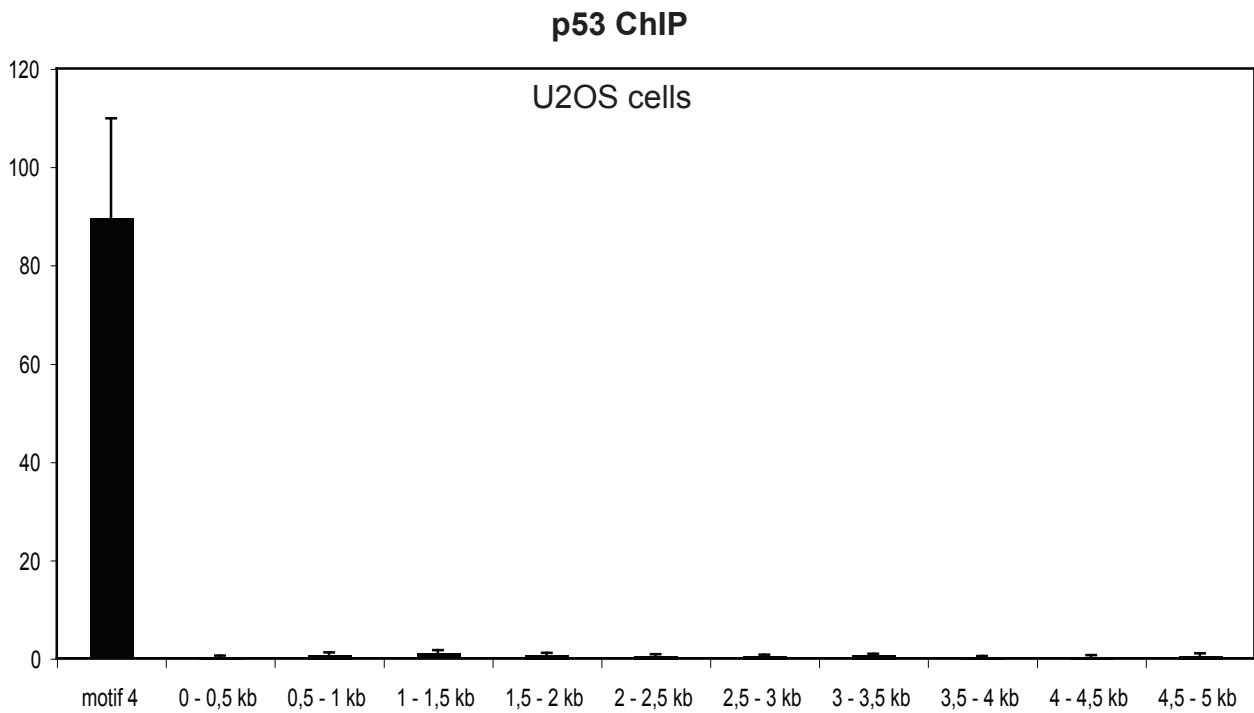

Fig. S1

Figure S1:

U2OS cells were treated with 5 nM Act.D for 24 hr prior to chromatin isolation and ChIP against p53. Quantitative PCR was performed with primers scanning a 5 kb region upstream of the IRF2BP2 gene. The motif 4 was used as a positive control. SD results from two independent experiments
